# Supplementary material
Source: Research Square preprint supplement (doi:10.21203/rs.3.rs-9830162/v1)
Supplement: Supplementary file 1 [file 8a32f54e6d1e28d7c3532c83.docx]

Supplementary Figure Captions


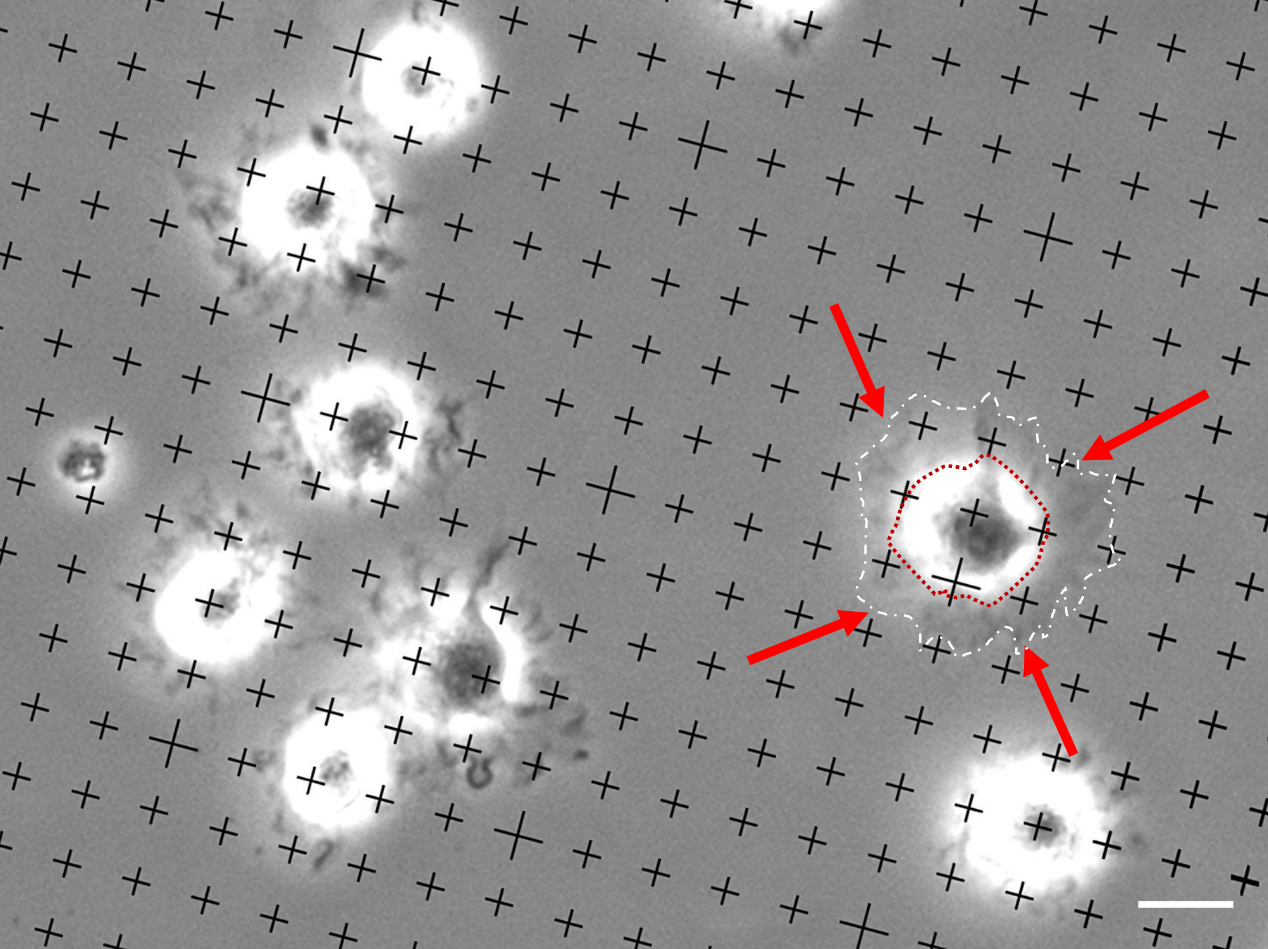
Supplementary Figure 1

Supplementary Figure 1 Graph depicting a point-counting method to measure the surface area of cell spreading. The grid was randomly put on the light micrographs of cells during spreading for the point-counting method. The filopodia and lamellipodia (red arrow, range of white dashed line) were included for calculating the cell spreading area, with the exclusion of the relatively constant peri-nuclear area (within red dot circle). Bar = 50 μm


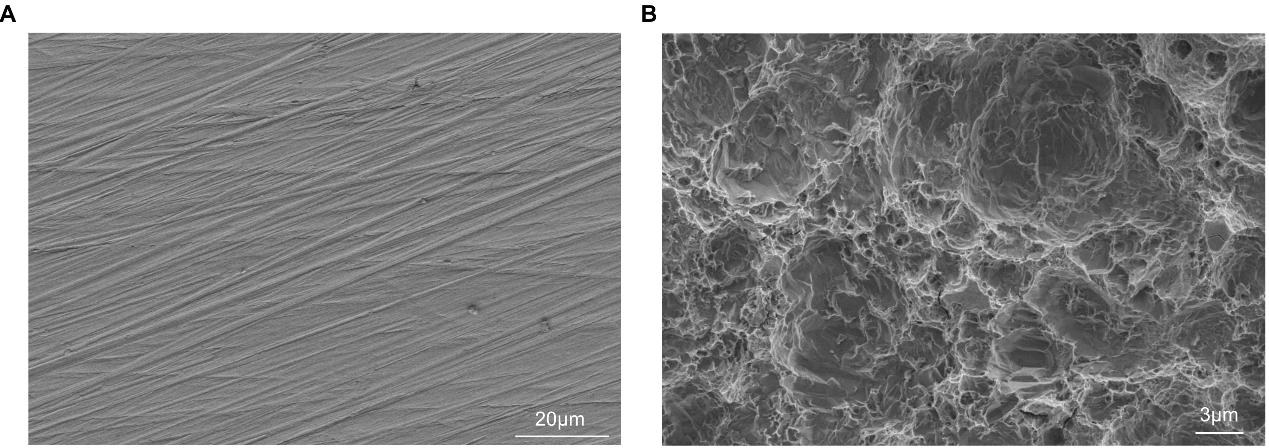
Supplementary Figure 2

Supplementary Figure 2 Representative SEM images of the titanium SLA surface after sandblasting and acid etching. (A) Magnification ×1,000; scale bar = 20 μm. (B) Magnification ×3,000; scale bar = 3 μm
